# Supplementary material for: PCP Signaling between Migrating Neurons and their Planar-Polarized Neuroepithelial Environment Controls Filopodial Dynamics and Directional Migration
Source: PubMed Central journal article supplement (PMC4798406; doi:10.1371/journal.pgen.1005934), 2016-03-18
Supplement: pgen.1005934.s018.pdf [file pgen.1005934.s018.pdf]

| <b>Construct</b>    | <b>Forward Primer Sequence</b>     | <b>Reverse Primer Sequence</b>    |
|---------------------|------------------------------------|-----------------------------------|
| <i>shh-ArD</i>      | 5'-GGTACCGGCCTGCATGGC-3'           | 5'-ACTTGCACTAGTCTTCACGGCTCATCA-3' |
| <i>xdd1</i>         | 5'-ATGGCGGAGACTAAAGTGATTTAC-3'     | 5'-TTACCTCATGACATCCACAAAGAACTC-3' |
| <i>dvl-DEP</i>      | 5'-ATGACCGTGGCCAAATGCTGGGAC-3'     | 5'-TTACCTCATGACATCCACAAAGAACTC-3' |
| <i>gata2</i>        | 5'-TGCAATAGGCCAAATCGACATTCA-3'     | 5'-CAAGTGTCCGCGCTTAGAAAATGC-3'    |
| <i>gal4VP16</i>     | 5'-ATGAAGCTACTGTCTTCTATCGAA-3'     | 5'-CTACATATCCAGAGCGCCGTAGGG-3'    |
| <i>fzd3aΔC</i>      | 5'-ATGGTTCTGCTTTGGGCTCTG-3'        | 5'-GGTCTTTTTACTCCCGACCCA-3'       |
| <i>vangl2</i>       | 5'-ACCATGGATAACGAGTCGCAGTACTCA -3' | 5'-TCACACCGAGGTTTCCGACTGGAG-3'    |
| <i>crest1(isl1)</i> | 5'-CTGAGTGGACCTGGCCACAGTCAA-3'     | 5'-GTCTTGGAAATGAAACAGACCA-3'      |
| <i>fzd3a</i>        | 5'-ACCATGGTTCTGCTTTGGGCTCTG-3'     | 5'-TGCTTTGGTCGCGTCCTCCTC-3'       |
